# Supplementary material
Source: Springer Nature journal article supplement (https://www.springermedizin.de/resource/supplementary/13102_2012_2_MOESM1_ESM.docx/9686418)
Supplement: MOESM1 [file 9686418]

**FIGURE 1.** Flowchart of patients’ recruitment.

Withdrew from the study n=3

Not reached n= 1

Surgery performed was not a TKA= 3

Underwent contralateral TKA within 6 months n=7

Deceased n=1

Withdrew from the study n=6

Not reached before surgery n= 6

Surgery performed elsewhere n=13

Decided not to undergo surgery n=11

Surgery cancelled because of medical reason n=7

Deceased n=1

Patients interviewed at 6 months after TKA

n= 138

Patients who underwent TKA and interviewed at surgery

n= 153

Patients recruited at enrolment

on the pre-surgery wait lists

n= 197

Declined study participation n= 23

Previous hip or knee arthroplasty= 182

Urgent surgery within one month n= 57

Not eligible because of other criteria n= 52

Eligible patients

n= 220

Could not be reached. n= 32*

Declined study participation n= 45*

Patients assessed for eligibility

n= 511

Patients enrolled on the pre-surgery wait lists for total knee arthroplasty (TKA)

n= 588

*Eligibility status unknown. Considered in participation proportion calculation.

This study was part of a broader investigation that measured the impacts of pre-surgery wait in patients undergoing TKA and recruitment was therefore done at the enrollment on the presurgey wait list and patient were followed during pre-surgey wait.
